# Supplementary material for: Uptake and Distribution of Administered Bone Marrow Mesenchymal Stem Cell Extracellular Vesicles in Retina
Source: MDPI journal article supplement (doi:10.3390/cells10040730), 2021-03-25
Supplement: s1 [file s1]

| Name                 | Manufacturer         | Type              | Catalog #     | Dilution |
|----------------------|----------------------|-------------------|---------------|----------|
| $\alpha$ -Tubulin    | Sigma-Aldrich        | Mouse monoclonal  | T6199         | 1:500    |
| $\beta$ -Tubulin III | Sigma-Aldrich        | Mouse monoclonal  | T8660         | 1:1000   |
| Brn-3a               | Santa Cruz           | Mouse monoclonal  | sc-8429 AF647 | 1:500    |
| CD11b/c              | BD Pharmingen        | Mouse monoclonal  | 550299        | 1:500    |
| GFAP                 | Agilent Technologies | Rabbit polyclonal | Z033429-2     | 1:1000   |
| IBA-1                | Novus Biologicals    | Goat polyclonal   | NB100-1028    | 1:750    |
| RBPMs                | Proteintech          | Rabbit polyclonal | 15187-1-AP    | 1:500    |
| Vimentin             | Santa Cruz           | Mouse monoclonal  | sc-6260       | 1:1000   |

Suppl. Table S1: Antibodies used in the study

| Brn3a/BT3   |        |        |          |               |                 |          |               |
|-------------|--------|--------|----------|---------------|-----------------|----------|---------------|
| Pearson's R | TM1    | TM2    | Li's ICQ | Spearman Rank | Spearman T-Stat | Costes P | Kendall's Tau |
| 0.68        | 0.7523 | 0.795  | 0.261    | 0.635         | 683.4769        | 1        | 0.4609        |
| IBA-1       |        |        |          |               |                 |          |               |
| Pearson's R | TM1    | TM2    | Li's ICQ | Spearman Rank | Spearman T-Stat | Costes P | Kendall's Tau |
| 0.51        | 0.4472 | 0.8023 | 0.272    | 0.50195       | 214.4017        | 1        | 0.4316        |
| Vimentin    |        |        |          |               |                 |          |               |
| Pearson's R | TM1    | TM2    | Li's ICQ | Spearman Rank | Spearman T-Stat | Costes P | Kendall's Tau |
| 0.38        | 0.0869 | 0.7427 | 0.155    | 0.1358        | 140.3122        | 1        | 0.1172        |

Suppl. Table S2: Analysis of co-localization in flatmounts in vivo. See Methods for details. Shown here are the co-localization parameters for green EVs and Brn3a/BT3 for RGCs, IBA-1 for microglia, and vimentin for astrocytes.
